# Supplementary material for: A two-enzyme system in an amorphous metal–organic framework for the synthesis of d-phenyllactic acid
Source: Royal Society of Chemistry journal article supplement (doi:10.1039/d3tb00126a), 2023-01-01
Supplement: d3tb00126a1.pdf [file d3tb00126a1.pdf]

## Supporting Information for

### A two-enzyme system in an amorphous metal–organic framework for the synthesis of D-phenyllactic acid

Yifeng Wang<sup>a, b</sup>, Xiaolong Sun<sup>a</sup>, Jiahuan Hu<sup>a</sup>, Qing Guo<sup>a, c</sup>, Ping Zhang<sup>d</sup>, Xi Luo<sup>a, \*</sup>, Baoxing Shen<sup>b, \*, \*</sup>, Yongqian Fu<sup>a, \*</sup>

<sup>a</sup> Taizhou Key Laboratory of Biomass Functional Materials Development and Application, Taizhou University, Jiaojiang 318000, Zhejiang, China

<sup>b</sup> School of Food Science and Pharmaceutical Engineering, Nanjing Normal University, Nanjing, Jiangsu 210023, China

<sup>c</sup> School of Biological and Chemical Engineering, Zhejiang University of Science and Technology, Hangzhou, Zhejiang 310023, China

<sup>d</sup> Zhejiang Kingsun Eco-Pack Co., Ltd., Xianju, Zhejiang 317300, China

\* Corresponding author E-mail address: lxtzusols@163.com; shenbx@njnu.edu.cn; bioengineer@163.com

## Table of Contents

| <b>1 Experimental Procedures</b> |                                                                                                                                                                                                                                                                                                                                       |
|----------------------------------|---------------------------------------------------------------------------------------------------------------------------------------------------------------------------------------------------------------------------------------------------------------------------------------------------------------------------------------|
| <b>S1</b>                        | Expression and purification of D-lactate dehydrogenase and glucose dehydrogenase                                                                                                                                                                                                                                                      |
| <b>S2</b>                        | Characterization of LDH/GDH-ZIFs biocomposites                                                                                                                                                                                                                                                                                        |
| <b>S3</b>                        | Determination of enzyme kinetic parameters                                                                                                                                                                                                                                                                                            |
| <b>2 Figures and Tables</b>      |                                                                                                                                                                                                                                                                                                                                       |
| <b>Fig. S1</b>                   | SDS-PAGE analysis. M: protein molecular weight marker; lane 1 and 4: soluble fractions from lactose induced <i>E. coli</i> /LDH and <i>E.coli</i> /GDH, respectively; lane 2 and 5: precipitates from lactose induced <i>E. coli</i> /LDH and <i>E.coli</i> /GDH, respectively; lane 3 and 6: the purified LDH and GDH, respectively. |
| <b>Fig. S2</b>                   | The calibration curves of BSA for analyzing the encapsulation rate of protein.                                                                                                                                                                                                                                                        |
| <b>Fig. S3</b>                   | Standard curve for determination of enzyme activity.                                                                                                                                                                                                                                                                                  |
| <b>Fig. S4</b>                   | Chromatographic peaks of the standards (Blue: 1 g/L PPA; Black: 1 g/L PLA; Red: 0.5 g/L PPA-PLA).                                                                                                                                                                                                                                     |
| <b>Fig. S5</b>                   | Relative activity of different LDH: GDH ratios.                                                                                                                                                                                                                                                                                       |
| <b>Fig. S6</b>                   | XPS spectra of ZIF-90 and LDH/GDH-ZIF-90.                                                                                                                                                                                                                                                                                             |
| <b>Fig. S7</b>                   | (A) SEM image of LDH/GDH-ZIF-90 biocatalysts; (B) Elemental Mappings of                                                                                                                                                                                                                                                               |

|                     |                                                                                                                                                                                                                                                                                                   |
|---------------------|---------------------------------------------------------------------------------------------------------------------------------------------------------------------------------------------------------------------------------------------------------------------------------------------------|
|                     | LDH/GDH-ZIF-90 biocatalysts show the presence of C, N, O, Zn, S and P atoms.                                                                                                                                                                                                                      |
| <b>Fig. S8</b>      | Images of confocal laser scanning microscope. (A) Distribution of LDH labeled with fluorescein isothiocyanate (FITC) in LDH/GDH-aZIF-90 composites; (B) Distribution of GDH labeled with Rhodamine B in LDH/GDH-aZIF-90 composites; (C) Distribution of two-enzyme in LDH/GDH-aZIF-90 composites. |
| <b>Fig. S9</b>      | (A) N <sub>2</sub> adsorption and desorption curves of LDH/GDH-ZIF-90 (Blue: adsorption; Red: Desorption); (D) pore size distribution of LDH/GDH-ZIF-90.                                                                                                                                          |
| <b>Fig. S10</b>     | Circular dichroism (CD) spectra of Free LDH and LDH-aZIF-90.                                                                                                                                                                                                                                      |
| <b>Fig. S11</b>     | Circular dichroism (CD) spectra of Free GDH and GDH-aZIF-90.                                                                                                                                                                                                                                      |
| <b>Fig. S12</b>     | Circular dichroism (CD) spectra of Free LDH/GDH and LDH/GDH-aZIF-90.                                                                                                                                                                                                                              |
| <b>Fig. S13</b>     | SEM image of LDH/GDH-aZIF-90 biocatalysts after reusability experiments.                                                                                                                                                                                                                          |
| <b>Table S1</b>     | LDH/GDH-ZIFs composites formed at different precursor concentrations                                                                                                                                                                                                                              |
| <b>Table S2</b>     | HPLC detection parameters                                                                                                                                                                                                                                                                         |
| <b>Table S3</b>     | LDH/GDH-ZIFs composites formed at different ratios of LDH: GDH                                                                                                                                                                                                                                    |
| <b>Table S4</b>     | Adsorption average pore width (4V/A by BET) of the LDH/GDH-ZIF-90, aZIF-90 and LDH/GDH-aZIF-90                                                                                                                                                                                                    |
| <b>Table S5</b>     | Comparison with other reported LDH/GDH system                                                                                                                                                                                                                                                     |
| <b>Table S6</b>     | Enzyme kinetic parameter                                                                                                                                                                                                                                                                          |
| <b>3 References</b> |                                                                                                                                                                                                                                                                                                   |

## Experimental Procedures

**S1:** Expression and purification of D-lactate dehydrogenase and glucose dehydrogenase

Based on the previous research<sup>1</sup>, our laboratory (Taizhou Key Laboratory of Biomass Functional Materials Development and Application) preserved *E. coli*/D-lactate dehydrogenase(D-LDH, abbreviated as LDH) engineering bacteria and *E. coli*/glucose dehydrogenase (GDH) engineering bacteria. The steps for the expression and purification of two-enzyme are as follows.

The expression strain was grown in Luria–Bertani (LB) medium containing 50  $\mu\text{g}\cdot\text{mL}^{-1}$  kanamycin at 180 rpm and 37 °C for 10 h. Then, the pre-culture was transferred to a fresh LB/kanamycin medium for further growth at 37 °C and 180 rpm. After 2 h, lactose with a final concentration of 10  $\text{g}\cdot\text{L}^{-1}$  was added to induce expression, and the culture was continued for 12 h at 28 °C and 150 rpm. Cells were collected by centrifugation at 6300  $\times g$  and 4 °C for 10 min, and crude enzyme solution was obtained from lysed cells.

The crude enzyme was loaded onto a  $\text{Ni}^{2+}$ -nitrilotriacetic acid column (1.6 cm $\times$ 10 cm, BioRad, USA) pre-equilibrated with Buffer A (20 mM potassium phosphate buffer, pH 8.0, 500 mM NaCl and 20 mM imidazole). Buffer B (20 mM potassium phosphate buffer pH 8.0, 500 mM NaCl and 500 mM imidazole) was used to elute the enzyme at a flow rate of 1.0  $\text{mL}\cdot\text{min}^{-1}$ . The purified enzyme was collected and dialyzed overnight against 20 mM potassium phosphate buffer (pH 8.0) to remove salt ions and imidazole.

**S2:** Characterization of LDH/GDH-ZIFs biocomposites

**Powder X-ray Diffraction (XRD):** XRD patterns were obtained using a Bruker D8 Advance X-ray diffractometer with  $\text{K}\alpha$  radiation ( $\lambda = 1.5405 \text{ \AA}$ ) from a Cu anode. The scan speed was 10  $^{\circ}\cdot\text{min}^{-1}$ , with a 0.02  $^{\circ}$  step, and the diffraction data were collected over a range of  $2\theta = 5\text{-}40^{\circ}$ .

**Thermogravimetric Analysis (TGA):** TGA data were collected using a TA instruments synchronous thermal analyzer (STA) (TGA/DSC). A sample of approximately 5 mg was placed on a ceramic pan and heated from 30 to 800 °C at a rate of 5  $^{\circ}\text{C}\cdot\text{min}^{-1}$ . Each sample was heated in a constant flow of air.

**Fourier transform infrared (FT-IR) spectroscopy:** FT-IR spectra were recorded on a Nicolet 5700 FTIR spectrometer using samples of approximately 1 mg. Thirty-two scans were recorded over the range of 4000–650  $\text{cm}^{-1}$ .

**Scanning Electron Microscope (SEM)/Energy Dispersive Spectrometer (EDS):** SEM images were recorded using a Hitachi S-4800 field-emission scanning electron microscope (FESEM). The elemental composition was determined using an energy-dispersive spectrometer (EDS).

**Gas Sorption:** Gas adsorption isotherms were recorded on an ASAP-2020-HD88 surface characterization analyzer. Samples comprising approximately 30 mg were placed into a glass analysis tube and degassed under a dynamic vacuum for 12 h at 105 °C before measurement. Nitrogen (N<sub>2</sub>) adsorption and desorption isotherms were measured at 277 K.

**X-Ray photoelectron spectroscopy (XPS):** XPS analysis was performed using Thermo Fisher Scientific K-Alpha, Al K $\alpha$  radiation ( $h\nu=1253.6$  eV).

**Circular dichroism spectra (CDs):** CD data was obtained by Applied Photophysics Chirascan to evaluate the possible secondary structure changes of the enzyme. The LDH-aZIF-90, GDH-aZIF-90, LDH/GDH-aZIF-90, free LDH, free GDH, and free LDH/GDH were incubated in the same buffer. CD spectra were measured on a CD spectrophotometer at room temperature using a quartz cuvette with a path length of 1 mm and recorded in the range 190-250 nm in steps of 0.5 nm.

**Confocal Laser Scanning Microscopy (CLSM):** LDH and GDH were labeled with fluorescein isothiocyanate (FITC) and rhodamine B, respectively. The distribution of both enzymes in amorphous ZIF-90 was characterized by CLSM (Olympus, FV3000).

### **S3: Determination of enzyme kinetic parameters**

The reaction mixture of 1.2 mL containing NAD<sup>+</sup>, PPA, Glu and enzyme solution or NADH, PPA and enzyme solution was dissolved in 20 mM Tris-HCl buffer (pH=7). After incubation at 30 °C for 1 min, the amount of D-PLA was determined by HPLC. One enzyme activity unit (U) was defined as the amount of enzyme producing 1  $\mu$ M D-PLA per minute. Enzyme activity was measured at different substrate concentrations (PPA, 2-10 mM;) and the data were fitted to the Michaelis-Menten equation.

## Figures and Tables

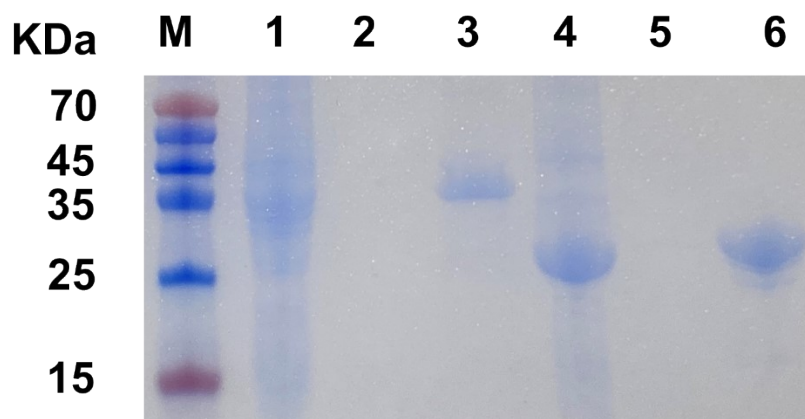

**Fig. S1:** SDS-PAGE analysis. M: protein molecular weight marker; lane 1 and 4: soluble fractions from lactose induced *E. coli*/LDH and *E. coli*/GDH, respectively; lane 2 and 5: precipitates from lactose induced *E. coli*/LDH and *E. coli*/GDH, respectively; lane 3 and 6: the purified LDH and GDH, respectively.

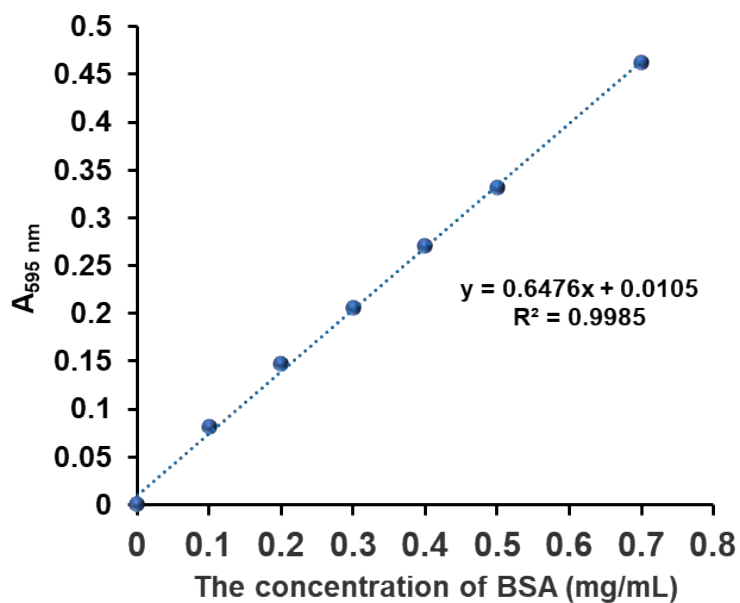

**Fig. S2:** The calibration curves of BSA for analyzing the encapsulation rate of protein.

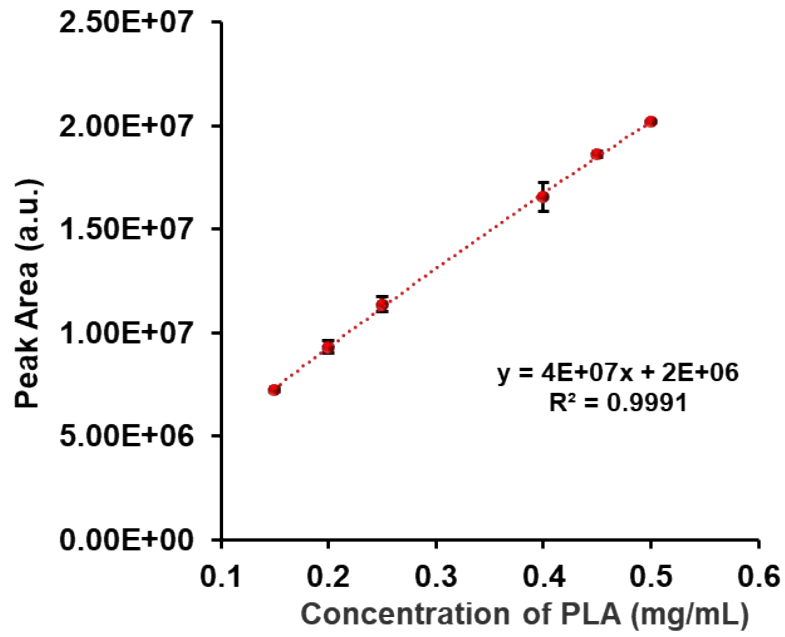

**Fig. S3:** Standard curve for determination of enzyme activity.

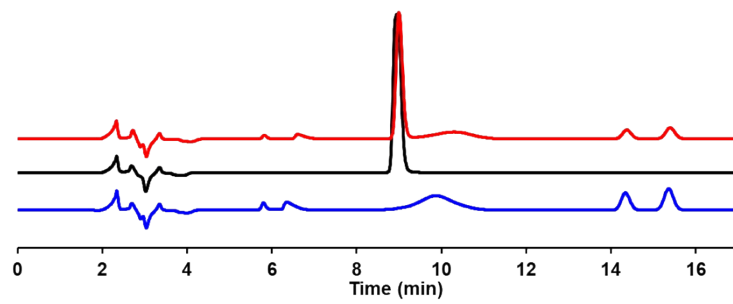

**Fig. S4:** Chromatographic peaks of the standards (Blue: 1 g/L PPA; Black: 1 g/L PLA; Red: 0.5 g/L PPA-PLA).

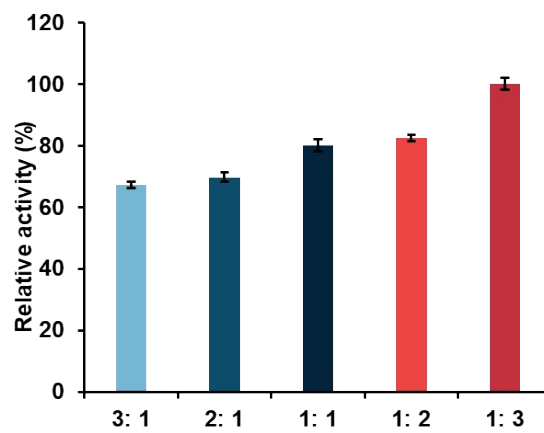

**Fig. S5:** Relative activity of different LDH:GDH ratios.

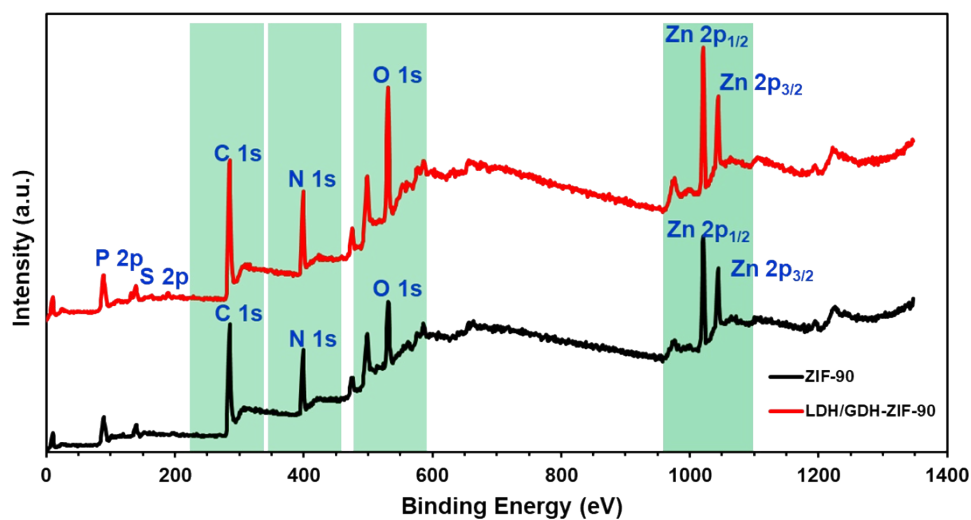

**Fig. S6:** XPS spectra of ZIF-90 and LDH/GDH-ZIF-90.

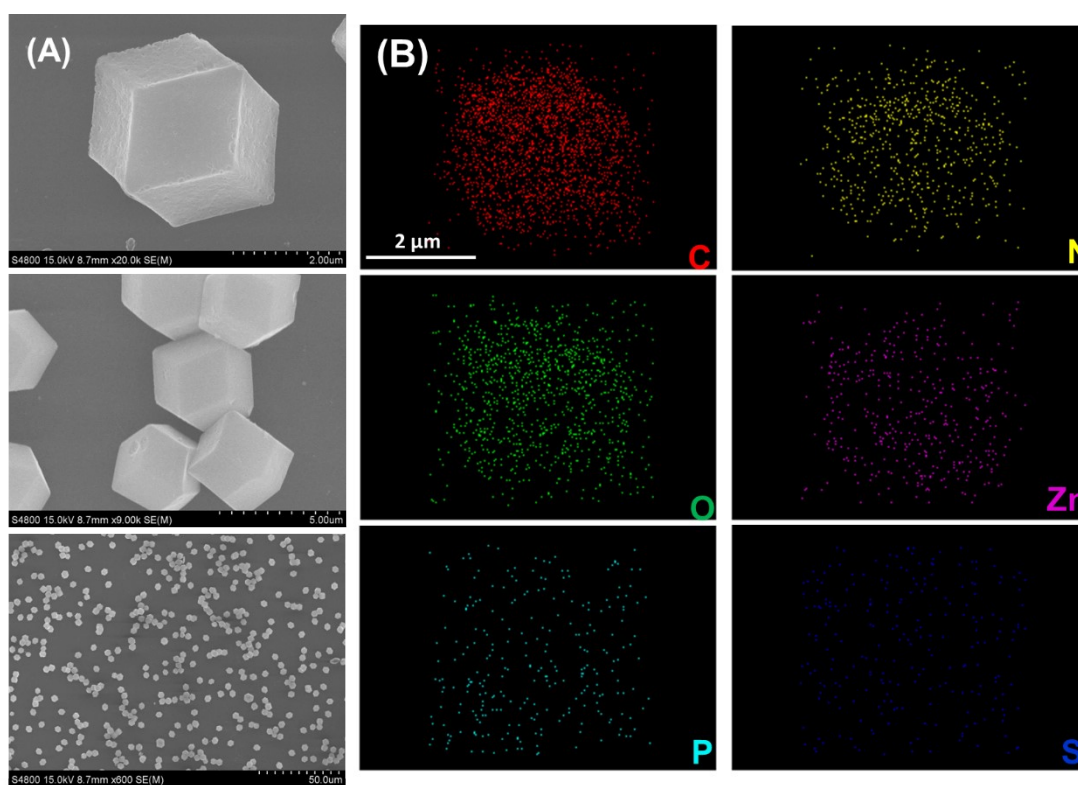

**Fig. S7:** (A) SEM image of LDH/GDH-ZIF-90 biocatalysts; (B) Elemental Mappings of LDH/GDH-ZIF-90 biocatalysts show the presence of C, N, O, Zn, S and P atoms.

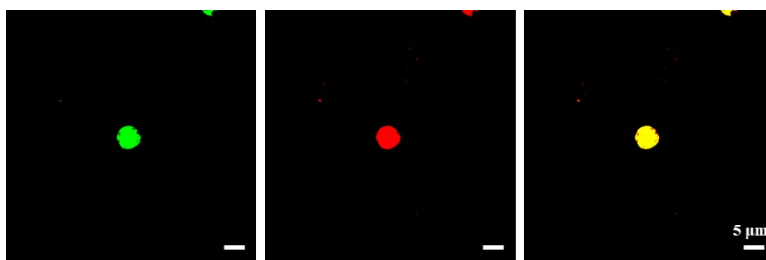

**Fig. S8:** Images of confocal laser scanning microscope. (A) Distribution of LDH labeled with fluorescein isothiocyanate (FITC) in LDH/GDH-aZIF-90 composites; (B) Distribution of GDH labeled with Rhodamine B in LDH/GDH-aZIF-90 composites; (C) Distribution of two-enzyme in LDH/GDH-aZIF-90 composites.

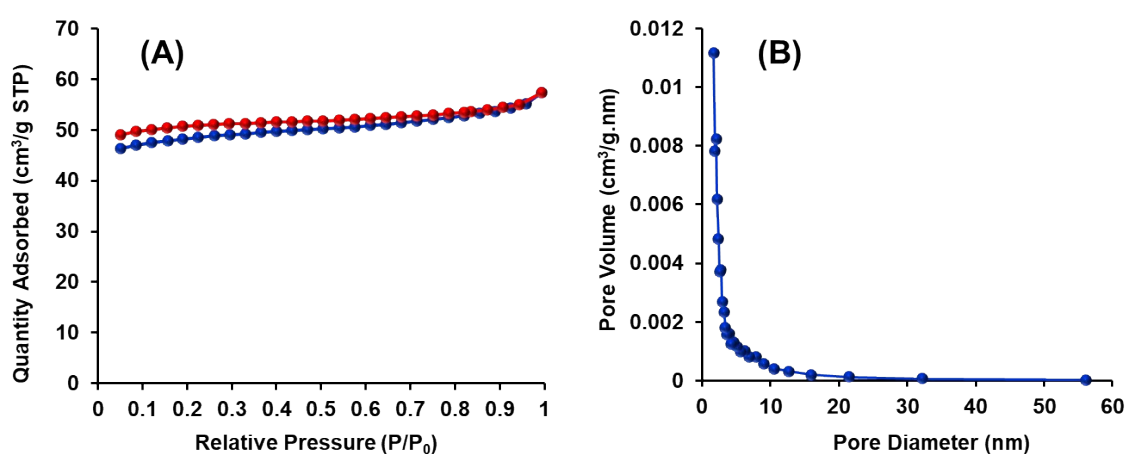

**Fig. S9:** (A)  $N_2$  adsorption and desorption curves of LDH/GDH-ZIF-90 (Blue: adsorption; Red: Desorption); (D) pore size distribution of LDH/GDH-ZIF-90.

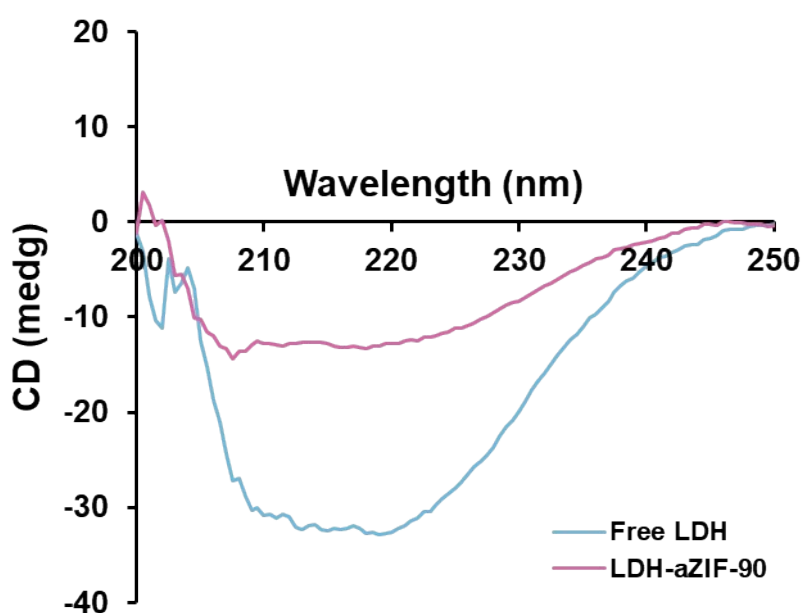

**Fig. S10:** Circular dichroism (CD) spectra of Free LDH and LDH-aZIF-90.



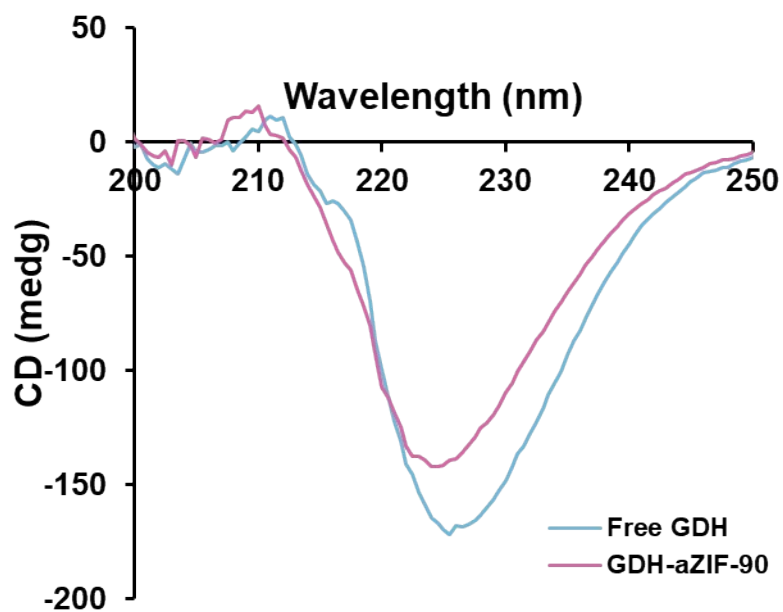

**Fig. S11:** Circular dichroism (CD) spectra of Free GDH and GDH-aZIF-90.

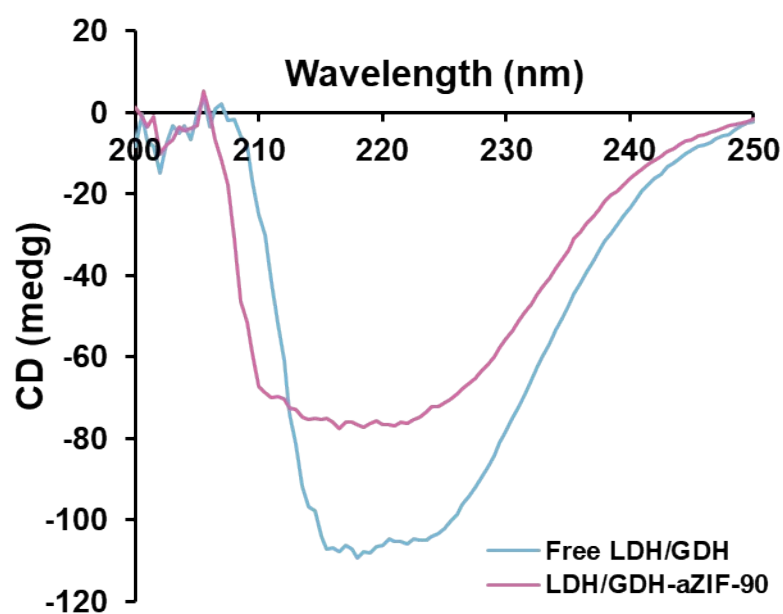

**Fig. S12:** Circular dichroism (CD) spectra of Free LDH/GDH and LDH/GDH-aZIF-90.

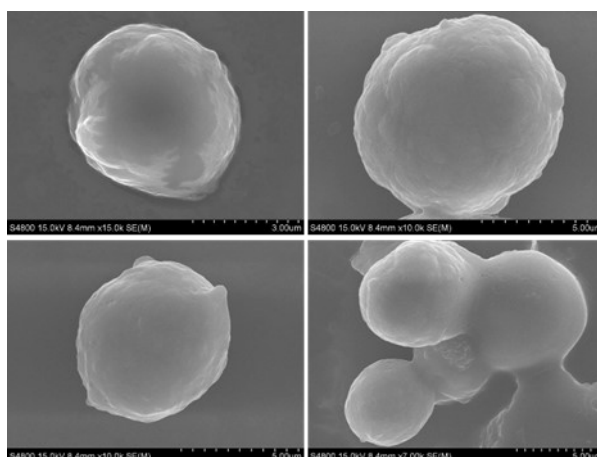

**Fig. S13:** SEM image of LDH/GDH-aZIF-90 biocatalysts after reusability experiments.

**Table S1** LDH/GDH-ZIFs composites formed at different precursor concentrations

| Sample | Concentrations of precursors                              | Concentrations of precursors HICA |
|--------|-----------------------------------------------------------|-----------------------------------|
|        | Zn(NO <sub>3</sub> ) <sub>2</sub> ·6H <sub>2</sub> O (mM) | (mM)                              |
| 1      | 40                                                        | 160                               |
| 2      | 40                                                        | 120                               |
| 3      | 40                                                        | 80                                |
| 4      | 40                                                        | 40                                |
| 5      | 40                                                        | 20                                |
| 6      | 30                                                        | 150                               |
| 7      | 30                                                        | 120                               |
| 8      | 30                                                        | 90                                |
| 9      | 30                                                        | 60                                |
| 10     | 30                                                        | 30                                |
| 11     | 30                                                        | 15                                |

**Table S2** HPLC detection parameters

| Parameters             | Detecting Condition                                |
|------------------------|----------------------------------------------------|
| Chromatographic Column | Hypersil ODS C <sub>18</sub> (250 mm×4.6 mm, 5 µm) |
| Mobile Phase           | 0.1% HCOOH: CH <sub>3</sub> CN=3: 1                |
| Flow Rate              | 1.0 mL/min                                         |
| Wavelength             | 210 nm                                             |
| Injection Volume       | 20 µL                                              |
| Column Temperature     | 40 °C                                              |

**Table S3** LDH/GDH-ZIFs composites formed at different ratios of LDH: GDH

| Ratio of LDH: GDH | Volume of LDH | Volume of GDH |
|-------------------|---------------|---------------|
| 3: 1              | 150           | 50            |
| 2: 1              | 133           | 67            |
| 1: 1              | 100           | 100           |
| 1: 2              | 67            | 133           |
| 1: 3              | 50            | 150           |

**Table S4** Adsorption average pore width (4V/A by BET) of the LDH/GDH-ZIF-90, aZIF-90 and LDH/GDH-aZIF-90

| Sample          | Adsorption average pore width (4V/A by BET) |
|-----------------|---------------------------------------------|
| LDH/GDH-ZIF-90  | 2.2 nm                                      |
| aZIF-90         | 18.1 nm                                     |
| LDH/GDH-aZIF-90 | 22.3 nm                                     |

**Table S5** Comparison with other reported LDH/GDH system

| strategies                | reaction condition | reaction system                               | specific enzyme activity (U·mg <sup>-1</sup> ) | productivity (%) | reference |
|---------------------------|--------------------|-----------------------------------------------|------------------------------------------------|------------------|-----------|
| two-enzyme expression     | pH=7, 35 °C        | 50 g/L PPA, 6.1 g/L Glu 50 mM                 | /                                              | 87.6             | 1         |
| two-enzyme expression     | pH=7, 42 °C        | PPA, 100 mM Glu 100 mM                        | 9.48 ± 0.91                                    | 97.83            | 2         |
| two-enzyme expression     | pH=5, 40 °C        | PPA, 120 mM Glu, 0.1mM NAD <sup>+</sup> 10 mM | 447.6                                          | 90.0             | 3         |
| Two-enzyme immobilization | pH=7, 30 °C        | PPA, 10 mM Glu,                               | 1.77±0.19                                      | 99.0%±5.6%       | This work |

10 mM

NAD<sup>+</sup>

**Table S6** Enzyme kinetic parameter

| parameters      | $K_m(\text{mM})$ | $V_{\max}(\text{U}\cdot\text{mg}^{-1})$ | $k_{\text{cat}}(\text{s}^{-1})$ | $k_{\text{cat}}/K_m(\text{mM}^{-1}\cdot\text{s}^{-1})$ |
|-----------------|------------------|-----------------------------------------|---------------------------------|--------------------------------------------------------|
| LDH             | 3.85             | 2.15                                    | 1.67                            | 0.43                                                   |
| LDH-aZIF-90     | 4.12             | 2.07                                    | 1.66                            | 0.40                                                   |
| LDH/GDH         | 4.70             | 2.60                                    | 2.08                            | 0.44                                                   |
| LDH/GDH-aZIF-90 | 4.59             | 2.57                                    | 2.06                            | 0.45                                                   |

## References

- 1 X. Luo, Y. Zhang, L. Yin, W. Zheng and Y. Fu, *3 Biotech*, 2020, **10**, 14.
- 2 Y. Zhu, Y. Wang, J. Xu, J. Chen, L. Wang and B. Qi, *Molecules*, 2017, **22**, 1966.
- 3 D. Zhang, T. Zhang, Y. Lei, W. Lin, X. Chen and M. Wu, *Front. Bioeng. Biotechnol.*, 2022, **10**, 846489.
